# Supplementary material
Source: ML conference proceedings conference paper supplement (https://openreview.net/forum?id=WK8LQzzHwW)
Supplement: supplementary_material [file attachment]

## 507 Supplement

508 In this supplementary material we (1) provide additional theorems and proofs for Section 3, and (2)  
509 further describe the experimental results.

### 510 A Theoretical Results

511 Firstly, we provide the proof for Theorem 3.1.

512 **Theorem 3.1** (Analysis of EXCEED) Let  $s$  be an anomaly score, and  $\psi_n \in [0, 1]$  the proportion of  
513 training scores  $\leq s$ . For  $T \geq 4$ , there exist  $t_1 = t_1(n, \gamma, T) \in [0, 1]$ ,  $t_2 = t_2(n, \gamma, T) \in [0, 1]$  such that

$$\psi_n \in [t_1, t_2] \implies \mathcal{M}_s \leq 1 - 2e^{-T}.$$

514 *Proof.* We split this proof into two parts: we show that the reverse inequalities, i.e. that **(a)** if  $\psi_n \leq t_1$ ,  
515 then  $\mathcal{M}_s \geq 1 - 2e^{-T}$ , and **(b)** if  $\psi_n \geq t_2$ , then  $\mathcal{M}_s \geq 1 - 2e^{-T}$ , hold and prove the final statement  
516 because  $\mathbb{P}(\hat{Y} = 1|s)$  is monotonic increasing on  $s$ .

517 **(a)** The probability  $\mathbb{P}(\hat{Y} = 1|s)$  (as in Eq. 1) can be seen as the cumulative distribution  $F$  of a binomial  
518 random variable  $\mathcal{B}(q_s, n)$  with at most  $n\gamma - 1$  successes out of  $n$  trials, with  $q_s = \frac{n(1-\psi_n)+1}{2+n}$  as the  
519 success probability. By applying Hoeffding's inequality, we obtain the upper bound

$$\mathbb{P}(\hat{Y} = 1|s) \leq \exp\left(-2n \left(\frac{n(1-\psi_n)+1}{2+n} - \frac{n\gamma-1}{n}\right)^2\right)$$

520 that holds for the constraint  $\psi_n \leq \frac{2+n}{n^2} + \frac{1-2\gamma}{n} + (1-\gamma)$ . Because  $\mathbb{P}(\hat{Y} = 1|s) \leq e^{-T}$  implies that  
521  $\mathcal{M}_s \geq 1 - 2e^{-T}$ , we search for the values of  $\psi_n$  such that the upper bound is  $\leq e^{-T}$ . Forcing the  
522 upper bound  $\leq e^{-T}$  results in

$$2n \left(\frac{n(1-\psi_n)+1}{2+n} - \frac{n\gamma-1}{n}\right)^2 - T \geq 0,$$

523 which is satisfied for  $(I_1)$   $0 \leq \psi_n \leq A_1 - \sqrt{B_1}$  and  $(I_2)$   $A_1 + \sqrt{B_1} \leq \psi_n \leq 1$ , where

$$A_1 = \frac{2+n(n+1)(1-\gamma)}{n^2} \quad B_1 = \frac{2n(-3\gamma^2 - 2n(1-\gamma)^2 + 4\gamma - 3) + T(n+2)^2 - 8}{2n^3}.$$

524 However, for  $T \geq 4$ , no values of  $n$ ,  $\gamma$ , and  $T$  that satisfy the constraint on  $\psi_n$  also satisfy  $I_2$ . Moving  
525 to  $I_1$ , we find out that if  $\psi_n$  satisfies  $I_1$ , then it also satisfies the constraint on  $\psi_n$  for any  $n$ ,  $\gamma$ , and  $T$ .  
526 Therefore, we set  $t_1(n, \gamma, T) = A_1 - \sqrt{B_1}$ . As a result,

$$\psi_n \leq t_1 \implies \mathbb{P}(\hat{Y} = 1|s) \leq e^{-T} \implies \mathcal{M}_s \geq 1 - 2e^{-T}.$$

527 **(b)** Similarly,  $\mathbb{P}(\hat{Y} = 0|s)$  can be seen as the cumulative distribution  $F$  of  $\mathcal{B}(p_s, n)$ , with  $n(1-\gamma)$   
528 successes and  $p_s = \frac{1+n\psi_n(s)}{2+n}$ . By seeing the binomial as a sum of Bernoulli random variables, and  
529 using the property of its cumulative distribution  $F(n(1-\gamma), n, p_s) + F(n\gamma-1, n, 1-p_s) = 1$ , we  
530 apply the Hoeffding's inequality and compare such upper bound to the  $e^{-T}$ . We obtain

$$2n \left(\frac{1+\psi_n n}{2+n} - (1-\gamma)\right)^2 - T \geq 0$$

531 that holds with the constraint  $\psi_n \geq \frac{(2+n)(1-\gamma)-1}{n}$ . The quadratic inequality in  $\psi_n$  has solutions  
532 for  $(I_1)$   $0 \leq \psi_n \leq A_2 - \sqrt{B_2}$  and  $(I_2)$   $A_2 + \sqrt{B_2} \leq \psi_n \leq 1$ , where  $A_2 = \frac{(2+n)(1-\gamma)-1}{n}$ , and  
533  $B_2 = \frac{T(n+2)^2}{2n^3}$ . However, the constraint limits the solutions to  $I_2$ , i.e. for  $\psi_n \geq A_2 + \sqrt{B_2}$ . Thus,  
534 we set  $t_2(n, \gamma, T) = A_2 + \sqrt{B_2}$  and conclude that

$$\psi_n \geq t_2 \implies \mathbb{P}(\hat{Y} = 1|s) \geq 1 - e^{-T} \implies \mathcal{M}_s \geq 1 - 2e^{-T}.$$

535

□

536 Secondly, Theorem 3.6 relies on two important results: given  $S$  the anomaly score random variable,  
 537 (1) if  $\psi_n$  was the *theoretical* cumulative of  $S$ , it would have a uniform distribution (Theorem A.1),  
 538 but because in practice (2)  $\psi_n$  is the *empirical* cumulative of  $S$ , its distribution is close to uniform  
 539 with high probability (Theorem A.2). We prove these results in the following theorems.

540 **Theorem A.1.** *Let  $S$  be the anomaly score random variable, and  $\psi = F_S(S)$  be the cumulative*  
 541 *distribution of  $S$  applied to  $S$  itself. Then  $\psi \sim \text{Unif}(0, 1)$ .*

542 *Proof.* We prove that, if  $\psi \sim \text{Unif}(0, 1)$ , then  $F_\psi(t) = t$  for any  $t \in [0, 1]$ :

$$F_\psi(t) = \mathbb{P}(\psi \leq t) = \mathbb{P}(F_S(S) \leq t) = \mathbb{P}(S \leq F_S^{-1}(t)) = F_S(F_S^{-1}(t)) = t \implies \psi \sim \text{Unif}(0, 1).$$

543 □

544 **Theorem A.2.** *Let  $\psi$  be as in Theorem A.1, and  $F_{\psi_n}$  be its empirical distribution obtained from a*  
 545 *sample of size  $n$ . For any small  $\delta > 0$  and  $t \in [0, 1]$ , with probability  $> 1 - \delta$*

$$F_{\psi_n}(t) \in \left[ F_\psi(t) - \sqrt{\frac{\ln \frac{2}{\delta}}{2n}}, F_\psi(t) + \sqrt{\frac{\ln \frac{2}{\delta}}{2n}} \right].$$

546 *Proof.* For any  $\varepsilon > 0$ , the DKW inequality implies

$$\mathbb{P} \left( \sup_{t \in [0,1]} |F_{\psi_n}(t) - F_\psi(t)| > \varepsilon \right) \leq 2 \exp(-2n\varepsilon^2).$$

547 By setting  $\delta = 2 \exp(-2n\varepsilon^2)$ , i.e.  $\varepsilon = \sqrt{\frac{\ln \frac{2}{\delta}}{2n}}$ , and using the complementary probability we  
 548 conclude that

$$\mathbb{P} \left( \sup_{t \in [0,1]} |F_{\psi_n}(t) - F_\psi(t)| \leq \sqrt{\frac{\ln \frac{2}{\delta}}{2n}} \right) > 1 - \delta.$$

549 □

550 Finally, we give the proof sketch for Corollary 3.2, as most of the steps follow from simple algebra:

551 **Corollary 3.2** Given  $t_1$  and  $t_2$  as in Theorem 3.1, the following properties hold for any  $s, n, \gamma, T \geq 4$ :

- 552 P1.  $\lim_{n \rightarrow +\infty} t_1 = \lim_{n \rightarrow +\infty} t_2 = 1 - \gamma$ ;
- 553 P2.  $t_1$  and  $t_2$  are, respectively, monotonic decreasing and increasing as functions of  $T$ ;
- 554 P3. the interval always contains  $1 - \gamma$ , i.e.  $t_1 \leq 1 - \gamma \leq t_2$ ;
- 555 P4. for  $n \rightarrow \infty$ , there exists  $s^*$  with  $\psi_n = t^* \in [t_1, t_2]$  such that  $t^* \rightarrow 1 - \gamma$  and  $\mathcal{M}_s \rightarrow 0$ .
- 556 P5.  $\psi_n \in [t_1, t_2]$  **iff**  $s \in [\lambda - u_1, \lambda + u_2]$ , where  $u_1(n, \gamma, T), u_2(n, \gamma, T)$  are positive functions.

557 *Proof sketch.* For P1, it is enough to observe that  $A_1, A_2 \rightarrow 1 - \gamma$ , while  $B_1, B_2 \rightarrow 0$  for  $n \rightarrow +\infty$ .  
 558 For P2 and P3, the result comes from simple algebraic steps. P4 follows from the surjectivity of  
 559  $\mathcal{M}_s$  when  $n \rightarrow +\infty$ , the monotonicity of  $\mathbb{P}(\hat{Y} = 1|s)$ , from P1 with the squeeze theorem. Finally,  
 560 P5 follows from  $\psi_n \in [t_1, t_2] \implies s \in [\psi_n^{-1}(t_1), \psi_n^{-1}(t_2)]$ , as  $\psi_n$  is monotonic increasing,  
 561 where  $\psi_n^{-1}$  is the inverse-image of  $\psi_n$ . Because for P3  $1 - \gamma \in [t_1, t_2]$ , it holds that  $\psi_n^{-1}(t_1) \leq$   
 562  $\psi_n^{-1}(1 - \gamma) = \lambda \leq \psi_n^{-1}(t_2)$ . This implies that  $s \in [\lambda - u_1, \lambda + u_2]$ , where  $u_1 = \lambda - \psi_n^{-1}(t_1)$ ,  
 563  $u_2 = \lambda - \psi_n^{-1}(t_2)$ . □

Table 2: Properties (number of examples, features, and contamination factor) of the 34 benchmark datasets used for the experiments.

| DATASET        | #EXAMPLES | #FEATURES | $\gamma$ |
|----------------|-----------|-----------|----------|
| ALOI           | 20000     | 27        | 0.0315   |
| ANNTHYROID     | 7062      | 6         | 0.0756   |
| CAMPAIGN       | 20000     | 62        | 0.1127   |
| CARDIO         | 1822      | 21        | 0.0960   |
| CARDIOTOGRAPHY | 2110      | 21        | 0.2204   |
| CENSUS         | 20000     | 500       | 0.0854   |
| DONORS         | 20000     | 10        | 0.2146   |
| FAULT          | 1941      | 27        | 0.3467   |
| FRAUD          | 20000     | 29        | 0.0021   |
| GLASS          | 213       | 7         | 0.0423   |
| HTTP           | 20000     | 3         | 0.0004   |
| INTERNETADS    | 1966      | 1555      | 0.1872   |
| LANDSAT        | 6435      | 36        | 0.2071   |
| LETTER         | 1598      | 32        | 0.0626   |
| LYMPHOGRAPHY   | 148       | 18        | 0.0405   |
| MAMMOGRAPHY    | 7848      | 6         | 0.0322   |
| MUSK           | 3062      | 166       | 0.0317   |
| OPTDIGITS      | 5198      | 64        | 0.0254   |
| PAGEBLOCKS     | 5393      | 10        | 0.0946   |
| PENDIGITS      | 6870      | 16        | 0.0227   |
| PIMA           | 768       | 8         | 0.3490   |
| SATELLITE      | 6435      | 36        | 0.3164   |
| SATIMAGE       | 5801      | 36        | 0.0119   |
| SHUTTLE        | 20000     | 9         | 0.0725   |
| THYROID        | 3656      | 6         | 0.0254   |
| VERTEBRAL      | 240       | 6         | 0.1250   |
| VOWELS         | 1452      | 12        | 0.0317   |
| WAVEFORM       | 3443      | 21        | 0.0290   |
| WBC            | 223       | 9         | 0.0448   |
| WDBC           | 367       | 30        | 0.0272   |
| WILT           | 4819      | 5         | 0.0533   |
| WINE           | 129       | 13        | 0.0775   |
| WPBC           | 198       | 33        | 0.2374   |
| YEAST          | 1453      | 8         | 0.3310   |

## B Experiments

**Data.** Table 2 shows the properties of the 34 datasets used for the experimental comparison, in terms of number of examples, features, and contamination factor  $\gamma$ . For the datasets with  $> 20,000$  examples, we randomly sub-sample them to 20,000 examples to limit the computational time. The datasets can be downloaded in the following link: <https://github.com/Minqi824/ADBench/tree/main/datasets/Classical>.

**Q1. REJEX against the baselines.** Table 3 and Table 4 show the results (mean  $\pm$  std) aggregated by detectors in terms of, respectively, cost per example and ranking position. Results confirm that REJEX obtains an average cost per example lower than all the baselines for 9 out of 12 detectors, which is similar to the runner-up SS-REPEN for the remaining 3 detectors. Moreover, REJEX has always the best (lowest) average ranking position.

**Q2. Varying the costs  $c_{fp}$ ,  $c_{fn}$ ,  $c_r$ .** Table 5 and Table 6 show the average cost per example and the ranking position (mean  $\pm$  std) aggregated by detectors for three representative cost functions, as discussed in the paper. Results are similar in all three cases. For high false positives cost ( $c_{fp} = 10$ ), REJEX obtains an average cost per example lower than all the baselines for 11 out of 12 detectors and always the best average ranking position. For high false negative cost ( $c_{fn} = 10$ ) as well as for low rejection cost ( $c_{fp} = 5, c_{fn} = 5, c_r = \gamma$ ), it has the lowest average cost for all detectors and always the best average ranking. Moreover, when rejection is highly valuable (low cost), REJEX's

cost has a large gap with respect to the baselines, which means that it is particularly useful when rejection is less expensive.

**Q5. Impact of training labels on REJEX.** In this experiment we include an additional baseline ORACLE, which uses EXCEED’s confidence metric and simulates having access to the training labels to set the optimal rejection threshold. Table 7 shows the average cost and rejection rates at test time obtained by the two methods. Overall, the two methods obtain similar costs, with ORACLE only achieving a lower average cost by 0.01. In terms of rejection rate, ORACLE rejects fewer examples: by finding an optimal threshold, it is able to reject fewer examples whenever the detector is accurate which reduces the number of rejected but otherwise correctly predicted examples.

Table 3: Cost per example (mean  $\pm$  std) per detector aggregated over the datasets. Results show that REJEX obtains a lower average cost for 9 out of 12 detectors and similar average cost as the runner-up SS-REPEN for the remaining 3 detectors. Moreover, REJEX has the best overall average (last row).

| DET.  | COST PER EXAMPLE (MEAN $\pm$ STD.)  |                                     |                   |                   |                   |                   |                   |                   |
|-------|-------------------------------------|-------------------------------------|-------------------|-------------------|-------------------|-------------------|-------------------|-------------------|
|       | REJEX                               | SS-REPEN                            | MV                | ENS               | UDR               | EM                | STABILITY         | NOREJECT          |
| AE    | <b>0.122 <math>\pm</math> 0.139</b> | 0.124 $\pm$ 0.133                   | 0.136 $\pm$ 0.143 | 0.134 $\pm$ 0.151 | 0.138 $\pm$ 0.148 | 0.143 $\pm$ 0.150 | 0.143 $\pm$ 0.149 | 0.148 $\pm$ 0.152 |
| COPOD | <b>0.123 <math>\pm</math> 0.138</b> | 0.125 $\pm$ 0.134                   | 0.135 $\pm$ 0.142 | 0.133 $\pm$ 0.140 | 0.140 $\pm$ 0.144 | 0.143 $\pm$ 0.148 | 0.145 $\pm$ 0.147 | 0.146 $\pm$ 0.148 |
| ECOD  | <b>0.120 <math>\pm</math> 0.136</b> | 0.124 $\pm$ 0.135                   | 0.129 $\pm$ 0.136 | 0.133 $\pm$ 0.143 | 0.139 $\pm$ 0.142 | 0.140 $\pm$ 0.145 | 0.143 $\pm$ 0.144 | 0.145 $\pm$ 0.145 |
| GMM   | <b>0.122 <math>\pm</math> 0.135</b> | 0.124 $\pm$ 0.137                   | 0.144 $\pm$ 0.141 | 0.136 $\pm$ 0.146 | 0.142 $\pm$ 0.145 | 0.156 $\pm$ 0.148 | 0.151 $\pm$ 0.147 | 0.156 $\pm$ 0.149 |
| HBOS  | <b>0.116 <math>\pm</math> 0.129</b> | 0.123 $\pm$ 0.138                   | 0.131 $\pm$ 0.132 | 0.134 $\pm$ 0.136 | 0.135 $\pm$ 0.137 | 0.139 $\pm$ 0.141 | 0.140 $\pm$ 0.139 | 0.142 $\pm$ 0.142 |
| IFOR  | <b>0.115 <math>\pm</math> 0.128</b> | 0.123 $\pm$ 0.135                   | 0.130 $\pm$ 0.136 | 0.129 $\pm$ 0.136 | 0.134 $\pm$ 0.139 | 0.140 $\pm$ 0.143 | 0.139 $\pm$ 0.141 | 0.143 $\pm$ 0.144 |
| INNE  | <b>0.113 <math>\pm</math> 0.129</b> | 0.122 $\pm$ 0.133                   | 0.145 $\pm$ 0.134 | 0.146 $\pm$ 0.140 | 0.145 $\pm$ 0.138 | 0.147 $\pm$ 0.140 | 0.146 $\pm$ 0.139 | 0.145 $\pm$ 0.140 |
| KDE   | <b>0.127 <math>\pm</math> 0.140</b> | <b>0.127 <math>\pm</math> 0.134</b> | 0.143 $\pm$ 0.145 | 0.138 $\pm$ 0.145 | 0.144 $\pm$ 0.145 | 0.150 $\pm$ 0.148 | 0.145 $\pm$ 0.143 | 0.152 $\pm$ 0.148 |
| KNN   | <b>0.119 <math>\pm</math> 0.123</b> | 0.125 $\pm$ 0.135                   | 0.140 $\pm$ 0.131 | 0.135 $\pm$ 0.131 | 0.135 $\pm$ 0.130 | 0.144 $\pm$ 0.132 | 0.141 $\pm$ 0.131 | 0.146 $\pm$ 0.133 |
| LODA  | <b>0.125 <math>\pm</math> 0.133</b> | <b>0.125 <math>\pm</math> 0.134</b> | 0.131 $\pm$ 0.130 | 0.139 $\pm$ 0.137 | 0.140 $\pm$ 0.136 | 0.146 $\pm$ 0.141 | 0.141 $\pm$ 0.131 | 0.151 $\pm$ 0.142 |
| LOF   | <b>0.126 <math>\pm</math> 0.131</b> | <b>0.126 <math>\pm</math> 0.136</b> | 0.155 $\pm$ 0.140 | 0.140 $\pm$ 0.139 | 0.142 $\pm$ 0.138 | 0.157 $\pm$ 0.140 | 0.151 $\pm$ 0.139 | 0.158 $\pm$ 0.140 |
| OCSVM | <b>0.120 <math>\pm</math> 0.131</b> | 0.125 $\pm$ 0.133                   | 0.138 $\pm$ 0.138 | 0.132 $\pm$ 0.140 | 0.138 $\pm$ 0.140 | 0.141 $\pm$ 0.140 | 0.137 $\pm$ 0.136 | 0.147 $\pm$ 0.143 |
| AVG.  | <b>0.121 <math>\pm</math> 0.133</b> | 0.125 $\pm$ 0.135                   | 0.138 $\pm$ 0.137 | 0.136 $\pm$ 0.140 | 0.139 $\pm$ 0.140 | 0.146 $\pm$ 0.143 | 0.144 $\pm$ 0.140 | 0.148 $\pm$ 0.144 |

Table 4: Ranking positions (mean  $\pm$  std) per detector aggregated over the datasets. Results show that REJEX obtains always the lowest average rank, despite being close to the runner-up SS-REPEN when the detector is LODA.

| DET.  | RANKING POSITION (MEAN $\pm$ STD.) |                 |                 |                 |                 |                 |                 |                 |
|-------|------------------------------------|-----------------|-----------------|-----------------|-----------------|-----------------|-----------------|-----------------|
|       | REJEX                              | SS-REPEN        | MV              | ENS             | UDR             | EM              | STABILITY       | NOREJECT        |
| AE    | <b>2.63 <math>\pm</math> 1.63</b>  | 3.96 $\pm$ 2.94 | 4.78 $\pm$ 2.10 | 3.81 $\pm$ 2.11 | 4.98 $\pm$ 1.88 | 5.15 $\pm$ 1.80 | 4.92 $\pm$ 1.78 | 5.77 $\pm$ 1.84 |
| COPOD | <b>2.49 <math>\pm</math> 1.65</b>  | 3.44 $\pm$ 2.75 | 3.97 $\pm$ 1.92 | 4.25 $\pm$ 2.17 | 5.24 $\pm$ 1.70 | 5.13 $\pm$ 1.67 | 5.59 $\pm$ 1.48 | 5.89 $\pm$ 2.13 |
| ECOD  | <b>2.43 <math>\pm</math> 1.44</b>  | 3.62 $\pm$ 2.86 | 3.73 $\pm$ 1.96 | 4.13 $\pm$ 2.29 | 5.53 $\pm$ 1.57 | 4.75 $\pm$ 1.62 | 5.74 $\pm$ 1.39 | 6.07 $\pm$ 1.93 |
| GMM   | <b>2.12 <math>\pm</math> 1.08</b>  | 3.05 $\pm$ 2.49 | 5.26 $\pm$ 1.92 | 3.49 $\pm$ 2.00 | 4.43 $\pm$ 1.66 | 6.26 $\pm$ 1.24 | 5.20 $\pm$ 1.43 | 6.20 $\pm$ 1.45 |
| HBOS  | <b>2.29 <math>\pm</math> 1.57</b>  | 3.64 $\pm$ 2.98 | 4.54 $\pm$ 2.11 | 4.39 $\pm$ 2.06 | 4.95 $\pm$ 1.79 | 5.04 $\pm$ 1.80 | 5.61 $\pm$ 1.40 | 5.52 $\pm$ 1.88 |
| IFOR  | <b>2.23 <math>\pm</math> 1.48</b>  | 3.78 $\pm$ 2.78 | 4.12 $\pm$ 1.90 | 4.26 $\pm$ 2.08 | 5.10 $\pm$ 1.88 | 5.27 $\pm$ 1.66 | 5.34 $\pm$ 1.38 | 5.91 $\pm$ 2.22 |
| INNE  | <b>1.73 <math>\pm</math> 1.14</b>  | 3.18 $\pm$ 2.74 | 5.86 $\pm$ 2.42 | 5.57 $\pm$ 1.40 | 4.94 $\pm$ 1.62 | 5.57 $\pm$ 1.60 | 5.32 $\pm$ 1.37 | 3.83 $\pm$ 1.63 |
| KDE   | <b>2.33 <math>\pm</math> 1.42</b>  | 3.99 $\pm$ 2.86 | 4.74 $\pm$ 2.06 | 3.79 $\pm$ 2.03 | 5.01 $\pm$ 1.90 | 5.43 $\pm$ 1.59 | 4.87 $\pm$ 1.92 | 5.84 $\pm$ 1.80 |
| KNN   | <b>2.02 <math>\pm</math> 1.29</b>  | 3.58 $\pm$ 2.87 | 4.87 $\pm$ 1.81 | 3.94 $\pm$ 1.94 | 4.41 $\pm$ 1.83 | 5.75 $\pm$ 1.49 | 5.22 $\pm$ 1.62 | 6.21 $\pm$ 1.48 |
| LODA  | <b>2.89 <math>\pm</math> 1.77</b>  | 3.17 $\pm$ 2.30 | 4.15 $\pm$ 2.26 | 4.36 $\pm$ 2.14 | 4.99 $\pm$ 2.00 | 5.50 $\pm$ 2.04 | 4.98 $\pm$ 2.11 | 5.95 $\pm$ 1.73 |
| LOF   | <b>2.04 <math>\pm</math> 1.01</b>  | 3.16 $\pm$ 2.73 | 5.68 $\pm$ 1.40 | 3.32 $\pm$ 1.71 | 3.96 $\pm$ 1.63 | 6.15 $\pm$ 1.19 | 5.47 $\pm$ 1.49 | 6.22 $\pm$ 1.31 |
| OCSVM | <b>2.33 <math>\pm</math> 1.29</b>  | 3.92 $\pm$ 2.84 | 4.89 $\pm$ 1.98 | 3.85 $\pm$ 2.17 | 4.86 $\pm$ 1.89 | 5.31 $\pm$ 1.80 | 5.06 $\pm$ 1.89 | 5.78 $\pm$ 1.66 |
| AVG.  | <b>2.29 <math>\pm</math> 1.40</b>  | 3.54 $\pm$ 2.76 | 4.72 $\pm$ 1.99 | 4.10 $\pm$ 2.01 | 4.87 $\pm$ 1.78 | 5.44 $\pm$ 1.63 | 5.28 $\pm$ 1.60 | 5.77 $\pm$ 1.76 |

Table 5: Cost per example (mean  $\pm$  std) per detector aggregated over the datasets. The table is divided into three parts, where each part has different costs (false positives, false negatives, rejection). Results show that REJEX obtains a lower average cost in all cases but one (KDE).

| DET.                                                                                                 | COST PER EXAMPLE FOR THREE COST FUNCTIONS (MEAN $\pm$ STD) |                                     |                   |                   |                   |                   |                   |                   |
|------------------------------------------------------------------------------------------------------|------------------------------------------------------------|-------------------------------------|-------------------|-------------------|-------------------|-------------------|-------------------|-------------------|
|                                                                                                      | REJEX                                                      | SS-REPEN                            | MV                | ENS               | UDR               | EM                | STABILITY         | NOREJECT          |
| FALSE POSITIVE COST = 10, FALSE NEGATIVE COST = 1, REJECTION COST = $\min\{10(1 - \gamma), \gamma\}$ |                                                            |                                     |                   |                   |                   |                   |                   |                   |
| AE                                                                                                   | <b>0.504 <math>\pm</math> 0.626</b>                        | 0.584 $\pm$ 0.723                   | 0.697 $\pm$ 0.763 | 0.661 $\pm$ 0.830 | 0.703 $\pm$ 0.829 | 0.766 $\pm$ 0.841 | 0.768 $\pm$ 0.826 | 0.825 $\pm$ 0.873 |
| COPOD                                                                                                | <b>0.491 <math>\pm</math> 0.637</b>                        | 0.593 $\pm$ 0.706                   | 0.686 $\pm$ 0.746 | 0.618 $\pm$ 0.726 | 0.707 $\pm$ 0.788 | 0.778 $\pm$ 0.825 | 0.785 $\pm$ 0.801 | 0.781 $\pm$ 0.833 |
| ECOD                                                                                                 | <b>0.479 <math>\pm</math> 0.628</b>                        | 0.584 $\pm$ 0.727                   | 0.625 $\pm$ 0.705 | 0.642 $\pm$ 0.755 | 0.711 $\pm$ 0.774 | 0.748 $\pm$ 0.803 | 0.770 $\pm$ 0.783 | 0.771 $\pm$ 0.817 |
| GMM                                                                                                  | <b>0.568 <math>\pm</math> 0.713</b>                        | 0.589 $\pm$ 0.752                   | 0.823 $\pm$ 0.878 | 0.715 $\pm$ 0.929 | 0.790 $\pm$ 0.925 | 0.941 $\pm$ 0.948 | 0.889 $\pm$ 0.929 | 0.950 $\pm$ 0.967 |
| HBOS                                                                                                 | <b>0.475 <math>\pm</math> 0.595</b>                        | 0.569 $\pm$ 0.758                   | 0.666 $\pm$ 0.693 | 0.697 $\pm$ 0.732 | 0.709 $\pm$ 0.764 | 0.776 $\pm$ 0.803 | 0.771 $\pm$ 0.770 | 0.809 $\pm$ 0.816 |
| IFOR                                                                                                 | <b>0.477 <math>\pm</math> 0.602</b>                        | 0.575 $\pm$ 0.712                   | 0.665 $\pm$ 0.718 | 0.634 $\pm$ 0.731 | 0.683 $\pm$ 0.786 | 0.776 $\pm$ 0.818 | 0.763 $\pm$ 0.788 | 0.808 $\pm$ 0.831 |
| INNE                                                                                                 | <b>0.479 <math>\pm</math> 0.592</b>                        | 0.567 $\pm$ 0.698                   | 0.752 $\pm$ 0.724 | 0.820 $\pm$ 0.795 | 0.815 $\pm$ 0.787 | 0.819 $\pm$ 0.793 | 0.818 $\pm$ 0.792 | 0.823 $\pm$ 0.799 |
| KDE                                                                                                  | 0.602 $\pm$ 0.827                                          | <b>0.589 <math>\pm</math> 0.704</b> | 0.819 $\pm$ 0.947 | 0.740 $\pm$ 0.913 | 0.793 $\pm$ 0.939 | 0.897 $\pm$ 0.945 | 0.774 $\pm$ 0.906 | 0.914 $\pm$ 0.945 |
| KNN                                                                                                  | <b>0.498 <math>\pm</math> 0.577</b>                        | 0.596 $\pm$ 0.726                   | 0.741 $\pm$ 0.734 | 0.669 $\pm$ 0.720 | 0.669 $\pm$ 0.736 | 0.777 $\pm$ 0.747 | 0.739 $\pm$ 0.735 | 0.800 $\pm$ 0.749 |
| LODA                                                                                                 | <b>0.518 <math>\pm</math> 0.619</b>                        | 0.574 $\pm$ 0.709                   | 0.574 $\pm$ 0.647 | 0.689 $\pm$ 0.729 | 0.701 $\pm$ 0.748 | 0.762 $\pm$ 0.774 | 0.697 $\pm$ 0.682 | 0.827 $\pm$ 0.797 |
| LOF                                                                                                  | <b>0.539 <math>\pm</math> 0.623</b>                        | 0.603 $\pm$ 0.742                   | 0.898 $\pm$ 0.840 | 0.685 $\pm$ 0.773 | 0.715 $\pm$ 0.790 | 0.891 $\pm$ 0.813 | 0.831 $\pm$ 0.821 | 0.887 $\pm$ 0.808 |
| OCSVM                                                                                                | <b>0.479 <math>\pm</math> 0.599</b>                        | 0.589 $\pm$ 0.705                   | 0.745 $\pm$ 0.790 | 0.632 $\pm$ 0.752 | 0.694 $\pm$ 0.782 | 0.760 $\pm$ 0.775 | 0.695 $\pm$ 0.737 | 0.818 $\pm$ 0.806 |
| FALSE POSITIVE COST = 1, FALSE NEGATIVE COST = 10, REJECTION COST = $\min\{1 - \gamma, 10\gamma\}$   |                                                            |                                     |                   |                   |                   |                   |                   |                   |
| AE                                                                                                   | <b>0.730 <math>\pm</math> 0.747</b>                        | 0.761 $\pm$ 0.756                   | 0.909 $\pm$ 0.882 | 0.784 $\pm$ 0.825 | 0.780 $\pm$ 0.805 | 0.819 $\pm$ 0.843 | 0.789 $\pm$ 0.825 | 0.797 $\pm$ 0.821 |
| COPOD                                                                                                | <b>0.761 <math>\pm</math> 0.767</b>                        | 0.765 $\pm$ 0.770                   | 0.930 $\pm$ 0.888 | 0.794 $\pm$ 0.805 | 0.800 $\pm$ 0.801 | 0.844 $\pm$ 0.842 | 0.802 $\pm$ 0.815 | 0.827 $\pm$ 0.832 |
| ECOD                                                                                                 | <b>0.739 <math>\pm</math> 0.759</b>                        | 0.767 $\pm$ 0.766                   | 0.900 $\pm$ 0.858 | 0.789 $\pm$ 0.811 | 0.788 $\pm$ 0.787 | 0.840 $\pm$ 0.839 | 0.791 $\pm$ 0.803 | 0.821 $\pm$ 0.819 |
| GMM                                                                                                  | <b>0.670 <math>\pm</math> 0.676</b>                        | 0.765 $\pm$ 0.767                   | 0.845 $\pm$ 0.782 | 0.754 $\pm$ 0.755 | 0.739 $\pm$ 0.736 | 0.785 $\pm$ 0.757 | 0.760 $\pm$ 0.753 | 0.766 $\pm$ 0.750 |
| HBOS                                                                                                 | <b>0.687 <math>\pm</math> 0.684</b>                        | 0.776 $\pm$ 0.782                   | 0.824 $\pm$ 0.808 | 0.750 $\pm$ 0.768 | 0.744 $\pm$ 0.747 | 0.785 $\pm$ 0.787 | 0.749 $\pm$ 0.765 | 0.753 $\pm$ 0.766 |
| IFOR                                                                                                 | <b>0.679 <math>\pm</math> 0.680</b>                        | 0.775 $\pm$ 0.776                   | 0.847 $\pm$ 0.824 | 0.755 $\pm$ 0.771 | 0.743 $\pm$ 0.745 | 0.761 $\pm$ 0.772 | 0.757 $\pm$ 0.774 | 0.763 $\pm$ 0.770 |
| INNE                                                                                                 | <b>0.660 <math>\pm</math> 0.685</b>                        | 0.772 $\pm$ 0.779                   | 0.695 $\pm$ 0.620 | 0.774 $\pm$ 0.742 | 0.748 $\pm$ 0.722 | 0.758 $\pm$ 0.737 | 0.744 $\pm$ 0.716 | 0.773 $\pm$ 0.754 |
| KDE                                                                                                  | <b>0.691 <math>\pm</math> 0.692</b>                        | 0.791 $\pm$ 0.773                   | 0.887 $\pm$ 0.836 | 0.754 $\pm$ 0.760 | 0.755 $\pm$ 0.744 | 0.785 $\pm$ 0.807 | 0.758 $\pm$ 0.754 | 0.759 $\pm$ 0.760 |
| KNN                                                                                                  | <b>0.706 <math>\pm</math> 0.657</b>                        | 0.767 $\pm$ 0.764                   | 0.839 $\pm$ 0.779 | 0.791 $\pm$ 0.736 | 0.769 $\pm$ 0.710 | 0.778 $\pm$ 0.736 | 0.799 $\pm$ 0.736 | 0.803 $\pm$ 0.729 |
| LODA                                                                                                 | <b>0.750 <math>\pm</math> 0.714</b>                        | 0.781 $\pm$ 0.775                   | 0.880 $\pm$ 0.850 | 0.811 $\pm$ 0.768 | 0.806 $\pm$ 0.761 | 0.804 $\pm$ 0.783 | 0.827 $\pm$ 0.780 | 0.838 $\pm$ 0.784 |
| LOF                                                                                                  | <b>0.738 <math>\pm</math> 0.679</b>                        | 0.764 $\pm$ 0.764                   | 0.999 $\pm$ 0.833 | 0.826 $\pm$ 0.757 | 0.810 $\pm$ 0.739 | 0.871 $\pm$ 0.770 | 0.867 $\pm$ 0.799 | 0.846 $\pm$ 0.747 |
| OCSVM                                                                                                | <b>0.730 <math>\pm</math> 0.711</b>                        | 0.780 $\pm$ 0.774                   | 0.953 $\pm$ 0.878 | 0.791 $\pm$ 0.786 | 0.795 $\pm$ 0.773 | 0.845 $\pm$ 0.833 | 0.787 $\pm$ 0.772 | 0.796 $\pm$ 0.783 |
| FALSE POSITIVE COST = 5, FALSE NEGATIVE COST = 5, REJECTION COST = $\gamma$                          |                                                            |                                     |                   |                   |                   |                   |                   |                   |
| AE                                                                                                   | <b>0.534 <math>\pm</math> 0.611</b>                        | 0.618 $\pm$ 0.666                   | 0.671 $\pm$ 0.716 | 0.644 $\pm$ 0.741 | 0.655 $\pm$ 0.736 | 0.707 $\pm$ 0.748 | 0.705 $\pm$ 0.740 | 0.738 $\pm$ 0.762 |
| COPOD                                                                                                | <b>0.545 <math>\pm</math> 0.619</b>                        | 0.627 $\pm$ 0.673                   | 0.676 $\pm$ 0.724 | 0.629 $\pm$ 0.674 | 0.666 $\pm$ 0.716 | 0.719 $\pm$ 0.747 | 0.719 $\pm$ 0.730 | 0.731 $\pm$ 0.739 |
| ECOD                                                                                                 | <b>0.529 <math>\pm</math> 0.609</b>                        | 0.625 $\pm$ 0.675                   | 0.629 $\pm$ 0.687 | 0.638 $\pm$ 0.702 | 0.662 $\pm$ 0.705 | 0.701 $\pm$ 0.736 | 0.708 $\pm$ 0.716 | 0.724 $\pm$ 0.727 |
| GMM                                                                                                  | <b>0.534 <math>\pm</math> 0.599</b>                        | 0.626 $\pm$ 0.687                   | 0.719 $\pm$ 0.709 | 0.656 $\pm$ 0.716 | 0.675 $\pm$ 0.720 | 0.776 $\pm$ 0.736 | 0.746 $\pm$ 0.731 | 0.780 $\pm$ 0.743 |
| HBOS                                                                                                 | <b>0.499 <math>\pm</math> 0.572</b>                        | 0.622 $\pm$ 0.694                   | 0.632 $\pm$ 0.661 | 0.650 $\pm$ 0.669 | 0.641 $\pm$ 0.681 | 0.695 $\pm$ 0.706 | 0.688 $\pm$ 0.686 | 0.710 $\pm$ 0.709 |
| IFOR                                                                                                 | <b>0.497 <math>\pm</math> 0.569</b>                        | 0.623 $\pm$ 0.677                   | 0.643 $\pm$ 0.680 | 0.620 $\pm$ 0.667 | 0.629 $\pm$ 0.692 | 0.696 $\pm$ 0.712 | 0.688 $\pm$ 0.701 | 0.714 $\pm$ 0.719 |
| INNE                                                                                                 | <b>0.491 <math>\pm</math> 0.569</b>                        | 0.617 $\pm$ 0.668                   | 0.622 $\pm$ 0.572 | 0.718 $\pm$ 0.691 | 0.691 $\pm$ 0.674 | 0.709 $\pm$ 0.685 | 0.705 $\pm$ 0.675 | 0.726 $\pm$ 0.698 |
| KDE                                                                                                  | <b>0.562 <math>\pm</math> 0.639</b>                        | 0.642 $\pm$ 0.673                   | 0.709 $\pm$ 0.739 | 0.666 $\pm$ 0.711 | 0.684 $\pm$ 0.726 | 0.748 $\pm$ 0.742 | 0.679 $\pm$ 0.689 | 0.761 $\pm$ 0.742 |
| KNN                                                                                                  | <b>0.521 <math>\pm</math> 0.544</b>                        | 0.628 $\pm$ 0.677                   | 0.687 $\pm$ 0.667 | 0.657 $\pm$ 0.646 | 0.634 $\pm$ 0.651 | 0.701 $\pm$ 0.664 | 0.693 $\pm$ 0.657 | 0.728 $\pm$ 0.664 |
| LODA                                                                                                 | <b>0.550 <math>\pm</math> 0.595</b>                        | 0.627 $\pm$ 0.677                   | 0.601 $\pm$ 0.649 | 0.670 $\pm$ 0.668 | 0.665 $\pm$ 0.680 | 0.708 $\pm$ 0.698 | 0.683 $\pm$ 0.645 | 0.757 $\pm$ 0.711 |
| LOF                                                                                                  | <b>0.554 <math>\pm</math> 0.580</b>                        | 0.628 $\pm$ 0.681                   | 0.809 $\pm$ 0.737 | 0.678 $\pm$ 0.682 | 0.674 $\pm$ 0.688 | 0.792 $\pm$ 0.703 | 0.759 $\pm$ 0.718 | 0.788 $\pm$ 0.698 |
| OCSVM                                                                                                | <b>0.523 <math>\pm</math> 0.582</b>                        | 0.631 $\pm$ 0.671                   | 0.704 $\pm$ 0.728 | 0.634 $\pm$ 0.685 | 0.657 $\pm$ 0.695 | 0.709 $\pm$ 0.704 | 0.660 $\pm$ 0.674 | 0.733 $\pm$ 0.716 |

Table 6: Rankings (mean  $\pm$  std) per detector aggregated over the datasets, where lower positions mean lower costs (better). The table is divided into three parts, where each part has different costs for false positives, false negatives, and rejection. REJEX obtains the lowest (best) average ranking position for all the detectors and all cost functions.

| DET.                                                                                                 | RANKINGS FOR THE THREE COST FUNCTIONS (MEAN $\pm$ STD) |                 |                 |                 |                 |                 |                 |                 |
|------------------------------------------------------------------------------------------------------|--------------------------------------------------------|-----------------|-----------------|-----------------|-----------------|-----------------|-----------------|-----------------|
|                                                                                                      | REJEX                                                  | SS-REPEN        | MV              | ENS             | UDR             | EM              | STABILITY       | NOREJECT        |
| FALSE POSITIVE COST = 10, FALSE NEGATIVE COST = 1, REJECTION COST = $\min\{10(1 - \gamma), \gamma\}$ |                                                        |                 |                 |                 |                 |                 |                 |                 |
| AE                                                                                                   | <b>2.35 <math>\pm</math> 1.37</b>                      | 3.84 $\pm$ 2.73 | 5.87 $\pm$ 2.40 | 3.68 $\pm$ 2.05 | 4.85 $\pm$ 1.96 | 5.33 $\pm$ 1.67 | 4.72 $\pm$ 1.68 | 5.36 $\pm$ 1.97 |
| COPOD                                                                                                | <b>2.25 <math>\pm</math> 1.45</b>                      | 3.63 $\pm$ 2.66 | 4.79 $\pm$ 2.27 | 3.89 $\pm$ 2.27 | 4.94 $\pm$ 1.76 | 5.46 $\pm$ 1.71 | 5.51 $\pm$ 1.45 | 5.54 $\pm$ 2.17 |
| ECOD                                                                                                 | <b>2.28 <math>\pm</math> 1.30</b>                      | 3.51 $\pm$ 2.73 | 4.63 $\pm$ 2.36 | 3.85 $\pm$ 2.21 | 5.34 $\pm$ 1.74 | 5.11 $\pm$ 1.66 | 5.38 $\pm$ 1.39 | 5.90 $\pm$ 2.09 |
| GMM                                                                                                  | <b>2.13 <math>\pm</math> 0.99</b>                      | 3.10 $\pm$ 2.43 | 6.36 $\pm$ 2.23 | 3.31 $\pm$ 1.94 | 4.21 $\pm$ 1.69 | 6.28 $\pm$ 1.27 | 5.18 $\pm$ 1.53 | 5.44 $\pm$ 1.50 |
| HBOS                                                                                                 | <b>2.12 <math>\pm</math> 1.42</b>                      | 3.46 $\pm$ 2.85 | 5.41 $\pm$ 2.42 | 4.25 $\pm$ 2.06 | 4.78 $\pm$ 1.78 | 5.35 $\pm$ 1.66 | 5.42 $\pm$ 1.47 | 5.20 $\pm$ 1.95 |
| IFOR                                                                                                 | <b>2.11 <math>\pm</math> 1.49</b>                      | 3.69 $\pm$ 2.61 | 4.73 $\pm$ 2.26 | 4.02 $\pm$ 2.11 | 5.07 $\pm$ 1.87 | 5.39 $\pm$ 1.61 | 5.36 $\pm$ 1.41 | 5.63 $\pm$ 2.24 |
| INNE                                                                                                 | <b>1.72 <math>\pm</math> 1.24</b>                      | 3.09 $\pm$ 2.68 | 5.42 $\pm$ 2.45 | 6.16 $\pm$ 1.44 | 5.47 $\pm$ 1.59 | 4.60 $\pm$ 1.51 | 5.32 $\pm$ 1.31 | 4.21 $\pm$ 1.80 |
| KDE                                                                                                  | <b>2.14 <math>\pm</math> 1.25</b>                      | 3.82 $\pm$ 2.68 | 5.73 $\pm$ 2.36 | 3.54 $\pm$ 1.92 | 4.75 $\pm$ 1.85 | 5.84 $\pm$ 1.58 | 4.83 $\pm$ 1.91 | 5.36 $\pm$ 1.75 |
| KNN                                                                                                  | <b>1.99 <math>\pm</math> 1.28</b>                      | 3.50 $\pm$ 2.74 | 5.55 $\pm$ 2.21 | 3.92 $\pm$ 2.02 | 4.37 $\pm$ 1.86 | 5.73 $\pm$ 1.46 | 5.23 $\pm$ 1.68 | 5.71 $\pm$ 1.71 |
| LODA                                                                                                 | <b>2.56 <math>\pm</math> 1.53</b>                      | 3.31 $\pm$ 2.31 | 4.29 $\pm$ 2.48 | 4.34 $\pm$ 2.14 | 5.03 $\pm$ 1.95 | 5.42 $\pm$ 1.88 | 4.96 $\pm$ 2.04 | 6.08 $\pm$ 1.75 |
| LOF                                                                                                  | <b>1.96 <math>\pm</math> 1.03</b>                      | 3.04 $\pm$ 2.46 | 7.12 $\pm$ 1.28 | 3.14 $\pm$ 1.60 | 3.73 $\pm$ 1.31 | 6.27 $\pm$ 1.14 | 5.59 $\pm$ 1.66 | 5.15 $\pm$ 1.39 |
| OCSVM                                                                                                | <b>2.15 <math>\pm</math> 1.20</b>                      | 3.93 $\pm$ 2.70 | 5.92 $\pm$ 2.30 | 3.58 $\pm$ 2.13 | 4.70 $\pm$ 1.92 | 5.40 $\pm$ 1.63 | 5.03 $\pm$ 1.89 | 5.29 $\pm$ 1.67 |
| FALSE POSITIVE COST = 1, FALSE NEGATIVE COST = 10, REJECTION COST = $\min\{1 - \gamma, 10\gamma\}$   |                                                        |                 |                 |                 |                 |                 |                 |                 |
| AE                                                                                                   | <b>2.98 <math>\pm</math> 1.93</b>                      | 3.82 $\pm$ 2.72 | 7.03 $\pm$ 1.95 | 4.30 $\pm$ 2.07 | 4.49 $\pm$ 1.82 | 4.96 $\pm$ 1.83 | 4.28 $\pm$ 1.62 | 4.14 $\pm$ 1.93 |
| COPOD                                                                                                | <b>2.91 <math>\pm</math> 2.04</b>                      | 3.56 $\pm$ 2.69 | 7.13 $\pm$ 1.56 | 4.15 $\pm$ 1.97 | 4.43 $\pm$ 1.87 | 5.30 $\pm$ 1.86 | 4.50 $\pm$ 1.60 | 4.03 $\pm$ 1.79 |
| ECOD                                                                                                 | <b>2.70 <math>\pm</math> 1.96</b>                      | 3.88 $\pm$ 2.82 | 6.87 $\pm$ 1.72 | 4.15 $\pm$ 2.02 | 4.74 $\pm$ 1.79 | 5.01 $\pm$ 2.03 | 4.23 $\pm$ 1.50 | 4.42 $\pm$ 1.90 |
| GMM                                                                                                  | <b>2.59 <math>\pm</math> 1.70</b>                      | 3.99 $\pm$ 2.85 | 6.84 $\pm$ 2.22 | 4.04 $\pm$ 2.12 | 4.08 $\pm$ 1.77 | 5.73 $\pm$ 1.37 | 4.62 $\pm$ 1.55 | 4.12 $\pm$ 1.58 |
| HBOS                                                                                                 | <b>2.96 <math>\pm</math> 2.14</b>                      | 4.32 $\pm$ 2.93 | 6.41 $\pm$ 2.20 | 4.49 $\pm$ 1.92 | 4.37 $\pm$ 1.82 | 5.15 $\pm$ 1.94 | 4.48 $\pm$ 1.65 | 3.81 $\pm$ 1.81 |
| IFOR                                                                                                 | <b>2.71 <math>\pm</math> 2.06</b>                      | 4.51 $\pm$ 2.92 | 6.80 $\pm$ 2.00 | 4.47 $\pm$ 2.09 | 4.62 $\pm$ 1.72 | 4.33 $\pm$ 1.66 | 4.55 $\pm$ 1.47 | 4.01 $\pm$ 1.93 |
| INNE                                                                                                 | <b>2.64 <math>\pm</math> 1.94</b>                      | 4.71 $\pm$ 2.93 | 5.06 $\pm$ 2.95 | 5.85 $\pm$ 1.52 | 5.06 $\pm$ 1.80 | 4.03 $\pm$ 1.64 | 4.72 $\pm$ 1.50 | 3.94 $\pm$ 1.87 |
| KDE                                                                                                  | <b>3.00 <math>\pm</math> 2.01</b>                      | 4.49 $\pm$ 2.93 | 6.51 $\pm$ 2.27 | 4.00 $\pm$ 1.84 | 4.40 $\pm$ 1.68 | 5.01 $\pm$ 1.97 | 4.40 $\pm$ 1.78 | 4.18 $\pm$ 1.96 |
| KNN                                                                                                  | <b>2.64 <math>\pm</math> 2.01</b>                      | 4.11 $\pm$ 3.01 | 6.67 $\pm$ 2.23 | 4.17 $\pm$ 1.89 | 4.13 $\pm$ 1.87 | 4.99 $\pm$ 1.60 | 4.88 $\pm$ 1.54 | 4.41 $\pm$ 1.64 |
| LODA                                                                                                 | <b>3.44 <math>\pm</math> 1.96</b>                      | 3.66 $\pm$ 2.71 | 6.32 $\pm$ 2.30 | 4.22 $\pm$ 1.94 | 4.36 $\pm$ 1.95 | 4.47 $\pm$ 2.17 | 4.53 $\pm$ 2.09 | 4.99 $\pm$ 1.87 |
| LOF                                                                                                  | <b>2.22 <math>\pm</math> 1.38</b>                      | 3.43 $\pm$ 2.67 | 7.74 $\pm$ 0.67 | 3.47 $\pm$ 1.73 | 3.63 $\pm$ 1.40 | 5.95 $\pm$ 1.17 | 5.35 $\pm$ 1.57 | 4.22 $\pm$ 1.38 |
| OCSVM                                                                                                | <b>2.82 <math>\pm</math> 1.71</b>                      | 3.83 $\pm$ 2.63 | 7.30 $\pm$ 1.50 | 4.23 $\pm$ 2.13 | 4.35 $\pm$ 1.78 | 5.34 $\pm$ 1.65 | 4.32 $\pm$ 1.95 | 3.80 $\pm$ 1.72 |
| FALSE POSITIVE COST = 5, FALSE NEGATIVE COST = 5, REJECTION COST = $\gamma$                          |                                                        |                 |                 |                 |                 |                 |                 |                 |
| AE                                                                                                   | <b>2.31 <math>\pm</math> 1.38</b>                      | 4.05 $\pm$ 2.78 | 5.85 $\pm$ 2.41 | 3.66 $\pm$ 2.12 | 4.69 $\pm$ 1.86 | 5.27 $\pm$ 1.68 | 4.84 $\pm$ 1.74 | 5.34 $\pm$ 1.92 |
| COPOD                                                                                                | <b>2.24 <math>\pm</math> 1.49</b>                      | 3.72 $\pm$ 2.70 | 4.62 $\pm$ 2.17 | 3.98 $\pm$ 2.34 | 4.89 $\pm$ 1.87 | 5.26 $\pm$ 1.58 | 5.57 $\pm$ 1.50 | 5.72 $\pm$ 2.10 |
| ECOD                                                                                                 | <b>2.18 <math>\pm</math> 1.31</b>                      | 3.92 $\pm$ 2.75 | 4.22 $\pm$ 2.22 | 3.93 $\pm$ 2.33 | 5.30 $\pm$ 1.82 | 4.91 $\pm$ 1.69 | 5.48 $\pm$ 1.38 | 6.06 $\pm$ 1.94 |
| GMM                                                                                                  | <b>1.96 <math>\pm</math> 0.97</b>                      | 3.31 $\pm$ 2.44 | 6.39 $\pm$ 2.21 | 3.36 $\pm$ 1.89 | 4.09 $\pm$ 1.68 | 6.29 $\pm$ 1.25 | 5.11 $\pm$ 1.51 | 5.48 $\pm$ 1.50 |
| HBOS                                                                                                 | <b>1.98 <math>\pm</math> 1.37</b>                      | 3.95 $\pm$ 2.88 | 5.30 $\pm$ 2.46 | 4.18 $\pm$ 2.01 | 4.63 $\pm$ 1.83 | 5.36 $\pm$ 1.68 | 5.41 $\pm$ 1.46 | 5.18 $\pm$ 1.93 |
| IFOR                                                                                                 | <b>2.01 <math>\pm</math> 1.46</b>                      | 4.10 $\pm$ 2.67 | 4.71 $\pm$ 2.26 | 3.96 $\pm$ 2.05 | 4.98 $\pm$ 1.96 | 5.35 $\pm$ 1.60 | 5.29 $\pm$ 1.42 | 5.60 $\pm$ 2.24 |
| INNE                                                                                                 | <b>1.70 <math>\pm</math> 1.25</b>                      | 3.75 $\pm$ 2.82 | 4.17 $\pm$ 2.42 | 6.02 $\pm$ 1.44 | 5.57 $\pm$ 1.78 | 4.56 $\pm$ 1.36 | 5.36 $\pm$ 1.38 | 4.87 $\pm$ 2.08 |
| KDE                                                                                                  | <b>2.22 <math>\pm</math> 1.35</b>                      | 4.24 $\pm$ 2.73 | 5.49 $\pm$ 2.55 | 3.62 $\pm$ 2.00 | 4.71 $\pm$ 1.95 | 5.60 $\pm$ 1.50 | 4.79 $\pm$ 1.86 | 5.34 $\pm$ 1.87 |
| KNN                                                                                                  | <b>1.98 <math>\pm</math> 1.23</b>                      | 3.88 $\pm$ 2.82 | 5.49 $\pm$ 2.39 | 3.91 $\pm$ 1.86 | 4.29 $\pm$ 1.86 | 5.56 $\pm$ 1.71 | 5.19 $\pm$ 1.63 | 5.69 $\pm$ 1.70 |
| LODA                                                                                                 | <b>2.58 <math>\pm</math> 1.60</b>                      | 3.59 $\pm$ 2.36 | 4.34 $\pm$ 2.58 | 4.26 $\pm$ 2.17 | 4.93 $\pm$ 1.98 | 5.33 $\pm$ 1.98 | 5.02 $\pm$ 1.98 | 5.94 $\pm$ 1.75 |
| LOF                                                                                                  | <b>1.88 <math>\pm</math> 0.96</b>                      | 3.26 $\pm$ 2.51 | 7.18 $\pm$ 1.29 | 3.16 $\pm$ 1.60 | 3.65 $\pm$ 1.32 | 6.24 $\pm$ 1.12 | 5.53 $\pm$ 1.69 | 5.10 $\pm$ 1.37 |
| OCSVM                                                                                                | <b>2.15 <math>\pm</math> 1.19</b>                      | 4.18 $\pm$ 2.77 | 5.73 $\pm$ 2.36 | 3.62 $\pm$ 2.20 | 4.59 $\pm$ 1.88 | 5.39 $\pm$ 1.59 | 5.05 $\pm$ 1.92 | 5.31 $\pm$ 1.67 |

Table 7: Mean  $\pm$  std. for the **cost per example** (on the left) and the **rejection rate** (on the right) at test time on a per detector basis and aggregated over the datasets.

| DET.  | COST PER EXAMPLE (MEAN $\pm$ STD.) |                   | REJECTION RATE (MEAN $\pm$ STD.) |                   |
|-------|------------------------------------|-------------------|----------------------------------|-------------------|
|       | REJEX                              | ORACLE            | REJEX                            | ORACLE            |
| AE    | 0.126 $\pm$ 0.139                  | 0.126 $\pm$ 0.139 | 0.131 $\pm$ 0.132                | 0.118 $\pm$ 0.125 |
| COPOD | 0.123 $\pm$ 0.140                  | 0.121 $\pm$ 0.140 | 0.123 $\pm$ 0.131                | 0.101 $\pm$ 0.114 |
| ECOD  | 0.119 $\pm$ 0.138                  | 0.118 $\pm$ 0.138 | 0.125 $\pm$ 0.130                | 0.107 $\pm$ 0.114 |
| GMM   | 0.123 $\pm$ 0.135                  | 0.122 $\pm$ 0.134 | 0.139 $\pm$ 0.143                | 0.132 $\pm$ 0.136 |
| HBOS  | 0.118 $\pm$ 0.129                  | 0.118 $\pm$ 0.129 | 0.139 $\pm$ 0.148                | 0.114 $\pm$ 0.128 |
| IFOR  | 0.118 $\pm$ 0.129                  | 0.118 $\pm$ 0.128 | 0.127 $\pm$ 0.131                | 0.118 $\pm$ 0.130 |
| INNE  | 0.115 $\pm$ 0.129                  | 0.115 $\pm$ 0.128 | 0.132 $\pm$ 0.132                | 0.122 $\pm$ 0.125 |
| KDE   | 0.129 $\pm$ 0.140                  | 0.129 $\pm$ 0.139 | 0.121 $\pm$ 0.129                | 0.105 $\pm$ 0.120 |
| KNN   | 0.119 $\pm$ 0.123                  | 0.118 $\pm$ 0.123 | 0.127 $\pm$ 0.129                | 0.112 $\pm$ 0.117 |
| LODA  | 0.125 $\pm$ 0.133                  | 0.122 $\pm$ 0.130 | 0.126 $\pm$ 0.124                | 0.110 $\pm$ 0.114 |
| LOF   | 0.126 $\pm$ 0.131                  | 0.125 $\pm$ 0.131 | 0.129 $\pm$ 0.126                | 0.118 $\pm$ 0.115 |
| OCSVM | 0.120 $\pm$ 0.131                  | 0.120 $\pm$ 0.131 | 0.126 $\pm$ 0.128                | 0.107 $\pm$ 0.115 |
| AVG.  | 0.122 $\pm$ 0.133                  | 0.121 $\pm$ 0.133 | 0.129 $\pm$ 0.132                | 0.114 $\pm$ 0.121 |
